# Supplementary material for: Genome-wide identification and transcriptional profiling of the basic helix-loop-helix gene family in tung tree (Vernicia fordii)
Source: PeerJ. 2022 Sep 28;10:e13981. doi: 10.7717/peerj.13981 (PMC9526410; doi:10.7717/peerj.13981)
Supplement: Table S1 [file peerj-10-13981-s001.xlsx]

## Sheet: Sheet1
	Primer Name	Primer(5'→3')	Tm(℃)
Stage-specific genes in tung tree flowers	VF13570_bHLH40-dlF1	CTTGCGGATGCTGTCACTTA	60
	VF13570_bHLH40-dlR1	GATCATGGCTTCCGATCCTA	60
	VF12272_bHLH60-dlF1	AAAAGAGGTGGCAACAATGG	60
	VF12272_bHLH60-dlR1	GAAAAGGGTCGTCGTCCATA	60
	VF17182_bHLH99-dlF1	GTGTTACTGTCCGGCCTCAT	60
	VF17182_bHLH99-dlR1	CATGAGTAGCCTGGCATTGA	60
	VF18316_bHLH43-dlF1	GAACCCAGGAATTGAAGCAT	60
	VF18316_bHLH43-dlR1	GTTCAAAACCACCACCAACC	60
Stage-specific genes in tung seed	VF21901_bHLH1-dlF1	AGCTGCTGCAAGGTTGAAAT	60
	VF21901_bHLH1-dlR1	TAGCATTGAAAGGCGGTCAT	60
	VF23690_bHLH6-dlF1	GGAGTTCGAGTTTGCTCACC	60
	VF23690_bHLH6-dlR1	CCCTTTTCTCCCAACACTCA	60
	VF15666_bHLH65-dlF1	GACCAAATTGCCTTTGAGGA	60
	VF15666_bHLH65-dlR1	CTCAGATGCAACGCCTGATA	60
Genes under low temperature stress in young plantlets of tung tree	bHLH29-dlF1	AACAACCAACCCTGTTCTGG	60
	bHLH29-dlR1	TGGGTAATGAGGAGGCAAAC	60
	bHLH51-dlF1	TCCAAGCATTCAAAGAAGCA	65
	bHLH51-dlR1	GAGTTGGATTCGTGGGAAAA	65
	bHLH31-dlF1	AAGCAGGAAGGCCTTGTTTT	60
	bHLH31-dlR1	ACAACCCTTCCCTCTTCTCA	60
	bHLH57-dlF2	CATGAAATGGGTTCAGCCTTA	65
	bHLH57-dlR2	TCCATAACTTGGGGCAGAAT	65
	bHLH43-dlF1	GAACCCAGGAATTGAAGCAT	60
	bHLH43-dlR1	GTTCAAAACCACCACCAACC	60
	bHLH47-dlF2	CTGACCCTTCCATTTTCCTG	60
	bHLH47-dlR2	AAGCCATGGGCAAAACTAAA	60
	bHLH59-dlF1	CCTAGAGATTGCCCAGGTGA	60
	bHLH59-dlR1	CTGCAGAAGCTGCATGAGAG	60
	bHLH70-dlF1	CATTAGGCCTTGAGATTCAACA	65
	bHLH70-dlR1	AGGCATCTTCCTCCATACCC	65
	bHLH72-dlF1	GCTGCAGTGGCAGACATAGA	60
	bHLH72-dlR1	ATCAACAGCGGTGACATTGA	60
	bHLH103-dlF1	TCCGATCTTTTGCCTGATCT	60
	bHLH103-dlR1	GTCTAATGCCCTTCGCCTTT	60
Reference gene	EF1α-F	GCCTGGTATGGTTGTGACCT	60/65
	EF1α-R	GGATCATCCTTGGAGTTGGA	60/65
