# Supplementary material for: Genome-wide identification and transcriptional profiling of the basic helix-loop-helix gene family in tung tree (Vernicia fordii)
Source: PeerJ. 2022 Sep 28;10:e13981. doi: 10.7717/peerj.13981 (PMC9526410; doi:10.7717/peerj.13981)
Supplement: Table S2 [file peerj-10-13981-s002.xlsx]

## Sheet: Sheet1
Gene ID	Gene Name	Chromosomal Location
VF21901	bHLH1	Chr1: +1429690…1430999
VF21918	bHLH2	Chr1: +1931970…1933440
VF21919	bHLH3	Chr1: +1971911…1974086
VF18713	bHLH4	Chr1: +7020790…7023623
VF18726	bHLH5	Chr1: +7266380…7267153
VF23690	bHLH6	Chr1: +9636553…9639946
VF06016	bHLH7	Chr1: +16043505…16045046
VF19981	bHLH8	Chr1: +48284003…48284599
VF11543	bHLH9	Chr1: +78866415…78867467
VF10931	bHLH10	Chr1: +100517900…100520479
VF22872	bHLH11	Chr1: -104321515…104327937
VF03267	bHLH12	Chr1: +106448570…106456258
VF27670	bHLH13	Chr1: -107119827…107122498
VF25485	bHLH14	Chr2: -2731629…2738567
VF17514	bHLH15	Chr2: -26237300…26245083
VF18516	bHLH16	Chr2: +52045193…52053149
VF20624	bHLH17	Chr2: -75526747…75530233
VF13185	bHLH18	Chr2: +82248057…82250566
VF26084	bHLH19	Chr2: -87899548…87902256
VF05916	bHLH20	Chr2: +90503244…90510298
VF03577	bHLH21	Chr2: -102062916…102064307
VF03728	bHLH22	Chr3: -1826348…1829424
VF28097	bHLH23	Chr3: -4284730…4286950
VF13410	bHLH24	Chr3: +17588025…17590108
VF23386	bHLH25	Chr3: +24310690…24312851
VF10982	bHLH26	Chr3: +39717189…39729870
VF22129	bHLH27	Chr3: -87152779…87153900
VF04859	bHLH28	Chr3: +95475946…95478880
VF02921	bHLH29	Chr4: -12588460…12590807
VF02926	bHLH30	Chr4: +12968035…12973206
VF16344	bHLH31	Chr4: +30934723…30936736
VF23100	bHLH32	Chr4: +100893077…100894224
VF15320	bHLH33	Chr5: -2617039…2619984
VF12800	bHLH34	Chr5: +69308539…69311177
VF10463	bHLH35	Chr5: +72303215…72305020
VF01645	bHLH36	Chr5: +74925980…74936682
VF10258	bHLH37	Chr5: +83247980…83252604
VF24227	bHLH38	Chr5: +85163869…85166679
VF13541	bHLH39	Chr5: +87363023…87367764
VF13570	bHLH40	Chr5: +87657295…87658764
VF28295	bHLH41	Chr6: +55677538…55679848
VF19062	bHLH42	Chr6: +72958453…72959101
VF18316	bHLH43	Chr6: +73915422…73917991
VF11395	bHLH44	Chr6: -75068459…75069976
VF19570	bHLH45	Chr6: -75561657…75566104
VF19458	bHLH46	Chr6: -76940987…76948538
VF19443	bHLH47	Chr6: +77105846…77109176
VF11661	bHLH48	Chr6: +80828583…80835972
VF11607	bHLH49	Chr6: -81374008…81375743
VF11578	bHLH50	Chr6: -81716803…81718275
VF06102	bHLH51	Chr6: +82314056…82315912
VF06258	bHLH52	Chr6: -83864026…83867380
VF11322	bHLH53	Chr6: -85659972…85665291
VF07732	bHLH54	Chr7: +39054820…39059105
VF17699	bHLH55	Chr7: +41277662…41279692
VF09423	bHLH56	Chr7: -55087467…55091774
VF16960	bHLH57	Chr7: +59294816…59296265
VF02906	bHLH58	Chr7: -62139724…62142383
VF20359	bHLH59	Chr7: -69427462…69432714
VF12272	bHLH60	Chr7: -71255600…71256172
VF16130	bHLH61	Chr7: -78237163…78241655
VF15999	bHLH62	Chr7: -79632627…79633888
VF23788	bHLH63	Chr8: +3414153…3417999
VF09719	bHLH64	Chr8: -26980723…26990197
VF15666	bHLH65	Chr8: -72652179…72655189
VF15576	bHLH66	Chr8: -75097247…75100455
VF01977	bHLH67	Chr9: +52583599…52591440
VF01976	bHLH68	Chr9: -52594270…52601058
VF08100	bHLH69	Chr9: +55532424…55534590
VF05608	bHLH70	Chr9: -56843885…56845238
VF13795	bHLH71	Chr9: +57983255…57984064
VF13753	bHLH72	Chr9: +58614687…58616042
VF18024	bHLH73	Chr9: -66750028…66751858
VF17941	bHLH74	Chr9: +67734890…67737584
VF17940	bHLH75	Chr9: +67743456…67745408
VF17922	bHLH76	Chr9: +67913664…67914452
VF27313	bHLH77	Chr10: +1389368…1390070
VF27276	bHLH78	Chr10: -1742496…1744625
VF27148	bHLH79	Chr10: -3253384…3257271
VF26964	bHLH80	Chr10: -4791619…4798225
VF25122	bHLH81	Chr10: -7260192…7263627
VF25114	bHLH82	Chr10: +7355816…7357869
VF05154	bHLH83	Chr10: +10868414…10870147
VF05222	bHLH84	Chr10: -11600705…11603642
VF05285	bHLH85	Chr10: +12411139…12411721
VF05291	bHLH86	Chr10: -12433255…12435048
VF26291	bHLH87	Chr10: -13468991…13484715
VF26396	bHLH88	Chr10: -14948055…14955187
VF26416	bHLH89	Chr10: -15217605…15222167
VF26434	bHLH90	Chr10: +15571369…15574232
VF21133	bHLH91	Chr10: +17274094…17275989
VF07417	bHLH92	Chr10: -19535334…19537064
VF14618	bHLH93	Chr10: +25350677…25357446
VF14617	bHLH94	Chr10: +25359395…25360295
VF06951	bHLH95	Chr11: +59452561…59456085
VF05755	bHLH96	Chr11: -64343660…64345595
VF04208	bHLH97	Chr11: +66948602…66950608
VF24512	bHLH98	Chr11: -67474653…67475834
VF17182	bHLH99	None
VF17183	bHLH100	None
VF17184	bHLH101	None
VF13305	bHLH102	None
VF22717	bHLH103	None
VF11429	bHLH104	None
