# Supplementary material for: Genome-wide identification and transcriptional profiling of the basic helix-loop-helix gene family in tung tree (Vernicia fordii)
Source: PeerJ. 2022 Sep 28;10:e13981. doi: 10.7717/peerj.13981 (PMC9526410; doi:10.7717/peerj.13981)
Supplement: Table S3 [file peerj-10-13981-s003.xlsx]

## Sheet: Gene Structure
Gene ID	Number of Intron	Number of exon
VF21901_bHLH1	3	4
VF21918_bHLH2	2	3
VF21919_bHLH3	3	4
VF18713_bHLH4	7	8
VF18726_bHLH5	0	1
VF23690_bHLH6	3	4
VF06016_bHLH7	2	3
VF19981_bHLH8	0	1
VF11543_bHLH9	0	1
VF10931_bHLH10	7	8
VF22872_bHLH11	7	8
VF03267_bHLH12	10	11
VF27670_bHLH13	7	8
VF25485_bHLH14	3	4
VF17514_bHLH15	5	6
VF18516_bHLH16	9	10
VF20624_bHLH17	8	9
VF13185_bHLH18	4	5
VF26084_bHLH19	6	7
VF05916_bHLH20	8	9
VF03577_bHLH21	1	2
VF03728_bHLH22	7	8
VF28097_bHLH23	2	3
VF13410_bHLH24	3	4
VF23386_bHLH25	5	6
VF10982_bHLH26	2	3
VF22129_bHLH27	1	2
VF04859_bHLH28	4	5
VF02921_bHLH29	5	6
VF02926_bHLH30	6	7
VF16344_bHLH31	2	3
VF23100_bHLH32	1	2
VF15320_bHLH33	5	6
VF12800_bHLH34	4	5
VF10463_bHLH35	5	6
VF01645_bHLH36	7	8
VF10258_bHLH37	2	3
VF24227_bHLH38	6	7
VF13541_bHLH39	9	10
VF13570_bHLH40	0	1
VF28295_bHLH41	6	7
VF19062_bHLH42	1	2
VF18316_bHLH43	5	6
VF11395_bHLH44	0	1
VF19570_bHLH45	5	6
VF19458_bHLH46	6	7
VF19443_bHLH47	8	9
VF11661_bHLH48	7	8
VF11607_bHLH49	3	4
VF11578_bHLH50	0	1
VF06102_bHLH51	0	1
VF06258_bHLH52	6	7
VF11322_bHLH53	5	6
VF07732_bHLH54	3	4
VF17699_bHLH55	0	1
VF09423_bHLH56	7	8
VF16960_bHLH57	2	3
VF02906_bHLH58	1	2
VF20359_bHLH59	9	10
VF12272_bHLH60	0	1
VF16130_bHLH61	6	7
VF15999_bHLH62	2	3
VF23788_bHLH63	5	6
VF09719_bHLH64	4	5
VF15666_bHLH65	7	8
VF15576_bHLH66	6	7
VF01977_bHLH67	4	5
VF01976_bHLH68	5	6
VF08100_bHLH69	7	8
VF05608_bHLH70	3	4
VF13795_bHLH71	1	2
VF13753_bHLH72	2	3
VF18024_bHLH73	4	5
VF17941_bHLH74	5	6
VF17940_bHLH75	2	3
VF17922_bHLH76	0	1
VF27313_bHLH77	1	2
VF27276_bHLH78	5	6
VF27148_bHLH79	2	3
VF26964_bHLH80	7	8
VF25122_bHLH81	3	4
VF25114_bHLH82	8	9
VF05154_bHLH83	2	3
VF05222_bHLH84	5	6
VF05285_bHLH85	1	2
VF05291_bHLH86	3	4
VF26291_bHLH87	13	14
VF26396_bHLH88	10	11
VF26416_bHLH89	6	7
VF26434_bHLH90	7	8
VF21133_bHLH91	1	2
VF07417_bHLH92	5	6
VF14618_bHLH93	3	4
VF14617_bHLH94	1	2
VF06951_bHLH95	4	5
VF05755_bHLH96	2	3
VF04208_bHLH97	4	5
VF24512_bHLH98	2	3
VF17182_bHLH99	2	3
VF17183_bHLH100	2	3
VF17184_bHLH101	2	3
VF13305_bHLH102	4	5
VF22717_bHLH103	1	2
VF11429_bHLH104	3	4
