# Supplementary material for: Genome-wide identification and transcriptional profiling of the basic helix-loop-helix gene family in tung tree (Vernicia fordii)
Source: PeerJ. 2022 Sep 28;10:e13981. doi: 10.7717/peerj.13981 (PMC9526410; doi:10.7717/peerj.13981)
Supplement: Table S4 [file peerj-10-13981-s004.xlsx]

## Sheet: Sheet1
	C1	C2	C3	C4	X1	X2	X3	X4
VF21901_bHLH1	12.8676	28.9907	62.7911	39.1778	10.2256	8.89465	10.8505	0.144875
VF21918_bHLH2	0	0	0	0.0355314	0	0.0551445	0	0.156554
VF21919_bHLH3	0.421353	0.144971	0.0286752	2.12078	0.311412	0.133034	0	2.49108
VF18713_bHLH4	40.7289	55.1336	83.9075	24.5778	20.8268	19.253	53.1314	4.95999
VF18726_bHLH5	3.66435	3.74916	5.86974	7.53778	0.63891	0.563616	1.19893	1.09833
VF23690_bHLH6	7.479	11.8961	13.3214	16.0292	7.08344	7.4401	5.86768	30.8312
VF06016_bHLH7	9.18337	20.2411	1.29424	0.401309	8.15975	7.62859	0.81588	0
VF19981_bHLH8	4.53013	2.8966	5.54271	4.92697	8.77821	2.84896	2.37554	0.157187
VF11543_bHLH9	1.16931	0.614225	1.20787	3.12026	0.394285	0.332273	0.531849	0.105011
VF10931_bHLH10	1.22874	1.49691	1.90376	1.79913	0.835321	0.522605	1.68925	32.4757
VF22872_bHLH11	5.28377	6.35499	4.4108	9.55638	6.54765	4.8058	5.24402	16.1326
VF03267_bHLH12	38.3154	32.0683	36.8558	21.7163	30.0959	27.1805	23.0656	18.3192
VF27670_bHLH13	0	0	0	0	0	0	0	0
VF25485_bHLH14	0	0	0	0	0	0	0	0
VF17514_bHLH15	4.18661	5.54228	6.10378	17.2938	3.66633	5.75202	11.789	16.7722
VF18516_bHLH16	34.1323	34.3788	39.9844	35.0309	26.221	23.7526	17.2031	10.7331
VF20624_bHLH17	261.323	4.34836	2.72146	1.75193	458.481	436.326	144.72	2.09979
VF13185_bHLH18	12.4366	8.18547	9.93838	11.8614	8.12903	8.63695	13.4128	33.5325
VF26084_bHLH19	11.1965	6.35624	2.49186	5.3321	10.0387	9.60743	10.9439	41.6631
VF05916_bHLH20	40.3101	46.4904	54.7995	40.7209	34.3611	39.634	37.2514	10.2029
VF03577_bHLH21	0	0	0	0	0	0	0	0
VF03728_bHLH22	9.37231	8.01098	5.69353	17.0735	6.16116	4.70103	3.50244	7.41926
VF28097_bHLH23	116.541	5.61856	3.44012	0.853579	144.959	89.6522	26.8135	1.12958
VF13410_bHLH24	0.091103	0.18694	0.534735	0.663201	0.278692	0.198302	1.59017	0.243214
VF23386_bHLH25	28.1635	23.4196	17.9302	16.5125	25.1842	19.2116	16.8959	17.1203
VF10982_bHLH26	0.059963	0.0304312	0.08555	0.0359269	0.0282154	0.0794856	0.142896	0
VF22129_bHLH27	10.3226	14.9911	13.3528	9.59807	11.0294	8.32535	14.9845	18.7361
VF04859_bHLH28	0.316677	0.58355	0.398487	0.652589	0.569031	1.2152	0.936222	0.906599
VF02921_bHLH29	7.18429	3.56723	4.74722	4.77559	4.48718	3.99143	3.67296	7.66839
VF02926_bHLH30	40.9082	35.3773	36.8202	32.7544	38.3939	37.2624	42.6463	97.4395
VF16344_bHLH31	0.61656	0.647213	0.171182	1.35335	0.294681	0.291804	0.270207	25.1468
VF23100_bHLH32	52.5536	151.402	190.586	343.683	84.8256	133.697	107.376	2.28745
VF15320_bHLH33	17.9066	10.5045	8.66756	12.752	13.2613	10.9715	8.23766	7.71365
VF12800_bHLH34	0	0	0	0	0	0	0	0
VF10463_bHLH35	1.37162	1.08463	0.860809	0.350682	0.819625	1.24032	1.70038	0.291521
VF01645_bHLH36	10.7534	10.0245	11.5372	12.707	10.1551	10.4091	12.1986	19.7183
VF10258_bHLH37	0.187839	0	0	0.118526	0.107572	0.152194	0	2.36713
VF24227_bHLH38	13.5838	18.2594	22.3543	34.7851	6.13276	5.54533	3.45871	2.76684
VF13541_bHLH39	8.12892	7.8842	8.02283	5.63998	6.36568	5.59192	2.74613	0.335509
VF13570_bHLH40	0.235548	0.787614	0.267469	22.2475	0.380142	0.0965081	0.0210684	1.91225
VF28295_bHLH41	8.80129	9.30416	7.54404	10.1359	5.55719	5.29859	8.58159	10.2474
VF19062_bHLH42	404.79	33.4787	9.50389	10.0993	1004.96	247.468	9.25606	5.26669
VF18316_bHLH43	13.2816	16.3819	13.2346	20.2379	10.4199	12.647	22.4807	201.36
VF11395_bHLH44	0.00026538	6.41881	1.67177	3.98628	1.99395	2.34044	1.90768	3.21209
VF19570_bHLH45	29.5583	42.2789	39.5118	34.825	34.5274	39.1207	33.0264	26.394
VF19458_bHLH46	51.8233	49.2622	55.2086	68.6611	52.5532	44.6371	27.2968	33.2665
VF19443_bHLH47	21.7787	22.9634	24.2617	17.8643	16.3762	11.7825	6.92215	4.13389e-53
VF11661_bHLH48	0	0	0	0	0	0	0	0
VF11607_bHLH49	16.1478	14.1122	14.6973	18.4461	11.4776	15.4821	2.94886	0
VF11578_bHLH50	16.5424	10.8803	10.7269	71.9498	14.4654	7.49358	1.94415	7.74198
VF06102_bHLH51	4.93775	7.31718	6.30549	12.498	7.35541	12.9694	9.93423	3.39782
VF06258_bHLH52	110.65	183.608	281.004	168.022	37.6892	50.3478	48.4786	4.43692
VF11322_bHLH53	0.758451	0.494587	0.559953	0.143942	0.8009	0.845296	2.09812	4.00158
VF07732_bHLH54	45.7772	49.3543	43.215	27.3558	37.1291	49.4091	27.1722	19.29
VF17699_bHLH55	0	0	0	0	0	0	0	0
VF09423_bHLH56	15.84	19.5664	17.1995	27.5172	22.1791	22.7619	26.9417	98.4796
VF16960_bHLH57	0	0.207034	1.29772	2.71486	0.127263	0	0	0
VF02906_bHLH58	7.41817	7.07955	8.157	9.05948	6.72552	6.67858	3.76964	9.34648
VF20359_bHLH59	100.787	134.633	148.531	75.6523	81.3923	88.7455	71.0962	170.36
VF12272_bHLH60	1.57198	0.804838	3.29317	0.190012	0.501843	1.1698	1.33264	0.617355
VF16130_bHLH61	0	0	0	0	0	0	0	0
VF15999_bHLH62	29.8145	87.0247	164.462	133.049	24.8695	24.8631	11.5901	0.146719
VF23788_bHLH63	25.2525	25.6168	26.7606	18.1241	22.3876	22.6889	46.9173	84.4029
VF09719_bHLH64	4.01551	8.19793	8.50825	27.3789	4.07212	6.55854	7.35742	67.4735
VF15666_bHLH65	15.8041	12.8571	11.6695	13.5743	16.1152	30.2615	55.9208	11.2413
VF15576_bHLH66	0.114072	0	0	0.227217	0.271499	0.03827	0.0710619	0.0506585
VF01977_bHLH67	1.82744	2.18854	2.92427	4.18086	2.63156	3.17048	3.33156	7.32495
VF01976_bHLH68	22.5802	26.0051	25.7158	25.2308	18.6297	21.88	26.2793	72.1351
VF08100_bHLH69	40.116	19.8436	20.9101	15.9948	30.2152	26.0788	22.3334	22.7537
VF05608_bHLH70	28.6925	22.9768	27.1792	52.8112	18.4476	10.3669	8.66675	0.534652
VF13795_bHLH71	4.202	4.67651	8.51594	7.05969	2.67745	2.74513	2.49048	0.626105
VF13753_bHLH72	8.53472	37.245	20.9039	15.9808	7.91843	16.7034	6.7953	0.34976
VF18024_bHLH73	0.070292	0	0	0.0298845	0.024621	0	0	0
VF17941_bHLH74	20.5321	22.4042	27.6752	33.7759	18.1091	17.729	24.5267	0.608864
VF17940_bHLH75	0	0.0396146	0	0.104528	0.078979	0.112366	0.305188	0.146531
VF17922_bHLH76	0.294685	0.802481	0.486702	0.155385	0.344391	5.56574	0	0.768207
VF27313_bHLH77	1.24319	1.29185	0.680557	1.49857	0.852932	1.02463	1.46362	0.495804
VF27276_bHLH78	25.2527	13.0804	10.1165	21.6916	12.2423	11.2059	8.97244	51.2273
VF27148_bHLH79	3.03481	5.17241	6.42668	4.87809	1.19129	1.50699	0.176938	0
VF26964_bHLH80	0	0	0	0	0	0	0	0.250846
VF25122_bHLH81	16.976	20.483	22.4309	17.8472	21.3731	20.92	23.5876	3.97586
VF25114_bHLH82	24.696	41.104	11.5132	8.67065	17.0526	20.053	9.72361	1.73317
VF05154_bHLH83	0.124747	0.686796	0.411588	7.38916	0.759328	0.983256	0.500866	7.88534
VF05222_bHLH84	11.2088	15.8294	12.6383	17.2936	10.447	11.8755	9.64444	8.55967
VF05285_bHLH85	3.40975	3.41235	1.472	2.54531	4.87119	3.03335	2.49421	3.76014e-08
VF05291_bHLH86	0	0	0	0	0	0	0	0
VF26291_bHLH87	0.820121	1.11951	1.5698	1.20931	1.22497	1.01093	1.98704	3.20145
VF26396_bHLH88	27.8732	26.6502	32.2538	26.5457	27.7402	19.9718	31.0713	55.3517
VF26416_bHLH89	11.0357	12.7801	13.2001	17.2798	9.27305	11.5103	13.8264	20.5813
VF26434_bHLH90	5.29894	9.17255	9.03778	10.8409	6.02224	7.31359	6.74866	49.3446
VF21133_bHLH91	4.33363	4.25143	5.15684	2.62754	3.0222	3.6929	2.68445	0.274923
VF07417_bHLH92	0.635243	6.46481	28.8986	55.1602	0.118259	0.128726	0.40087	73.3104
VF14618_bHLH93	0	0	0	0	0	0.0660415	1.04464	0
VF14617_bHLH94	0	0	0	0	0	0.036507	1.63699	0
VF06951_bHLH95	0	0	0	0	0	0	0	0
VF05755_bHLH96	0.589808	1.34354	3.654	1.15166	0.696922	0.368374	2.81921	0.293301
VF04208_bHLH97	28.502	22.2974	20.923	27.185	20.0148	17.2423	28.4144	29.5995
VF24512_bHLH98	0.0738361	0	0	3.29776	0.139457	0.262537	0	0.125894
VF17182_bHLH99	0.140539	0.01873	0	0.286054	0.623049	1.72154	5.56246	0.893706
VF17183_bHLH100	0.305372	0.0602055	0.0391859	0.107309	0.817726	2.77631	1.21068	0.747476
VF17184_bHLH101	1.12384	0.0880313	0	0.0585775	3.08094	3.01428	3.2118	0.0783673
VF13305_bHLH102	0	0	0.053136	0	0	0	0	0
VF22717_bHLH103	8.89609	16.5364	17.9812	10.3427	6.63548	8.8442	8.22882	9.90138
VF11429_bHLH104	2.75319	2.28722	1.95954	0.992867	1.68865	1.57609	0.74646	0.769379
