# Supplementary material for: Genome-wide identification and transcriptional profiling of the basic helix-loop-helix gene family in tung tree (Vernicia fordii)
Source: PeerJ. 2022 Sep 28;10:e13981. doi: 10.7717/peerj.13981 (PMC9526410; doi:10.7717/peerj.13981)
Supplement: Table S5 [file peerj-10-13981-s005.xlsx]

## Sheet: Sheet1
	10 WAF	15 WAF	20 WAF	25 WAF	30 WAF
VF21901_bHLH1	56.8558	13.3044	2.99619	0.572992	0.399105
VF21918_bHLH2	0	0.0168247	0	0	0
VF21919_bHLH3	0	0	0.0727707	0.0158607	0.0201503
VF18713_bHLH4	7.60637	7.04531	14.1774	2.22094	6.92471
VF18726_bHLH5	0.282526	0.0811543	0	0	0.0334873
VF23690_bHLH6	21.5299	26.805	68.3542	15.8722	205.137
VF06016_bHLH7	0	0	0.0605203	0	0
VF19981_bHLH8	1.58078	16.2037	3.66595	0.490586	0.0766203
VF11543_bHLH9	0.549599	1.09777	2.94579	0.534162	0.906813
VF10931_bHLH10	28.6942	32.5046	1.46875	0.319639	0.792244
VF22872_bHLH11	10.874	21.0522	5.82066	25.1639	40.9964
VF03267_bHLH12	32.602	27.9159	12.9044	13.1209	9.60593
VF27670_bHLH13	16.5517	32.1701	8.58104	4.53088	5.9618
VF25485_bHLH14	0	0.0756507	0	0	0
VF17514_bHLH15	12.4707	24.591	12.8998	7.0456	28.8442
VF18516_bHLH16	29.9987	19.7855	4.06937	6.83323	2.21281
VF20624_bHLH17	0.251742	1.5622	0.589166	1.05503	0.13015
VF13185_bHLH18	13.572	14.8404	21.608	11.5424	56.4293
VF26084_bHLH19	8.80802	9.24966	8.33959	2.34349	8.68561
VF05916_bHLH20	41.6998	20.0957	160.482	41.1285	54.3835
VF03577_bHLH21	0	0.105634	0.210788	0.00643167	0.077886
VF03728_bHLH22	7.55278	11.9452	6.82683	5.2044	28.6624
VF28097_bHLH23	1.43061	0.601635	1.59617	0.040692	0.0959767
VF13410_bHLH24	4.59631	2.1245	0.0545187	0	0.0236977
VF23386_bHLH25	18.3968	19.7013	7.45316	11.6228	8.85866
VF10982_bHLH26	0	2.35625	3.96548	0.901629	0.533762
VF22129_bHLH27	2.21442	0.636155	0.351534	0.047539	0.0729433
VF04859_bHLH28	0.74474	1.88646	214.765	70.5429	23.6293
VF02921_bHLH29	11.4347	10.8975	3.20653	1.78236	12.5586
VF02926_bHLH30	40.1794	8.95749	9.85171	12.5635	10.0953
VF16344_bHLH31	0.528063	0.635263	0.498013	0.409278	0.0335643
VF23100_bHLH32	66.9173	0.0394583	0	0.0296303	0
VF15320_bHLH33	13.9374	8.00306	9.67728	4.87533	6.79124
VF12800_bHLH34	0	0.0108397	0	0	0.0233787
VF10463_bHLH35	0.075677	0.0972797	0.234289	1.65376	0.840184
VF01645_bHLH36	12.8411	13.3555	6.55996	4.31906	5.85228
VF10258_bHLH37	0	0	0	0	0
VF24227_bHLH38	21.704	6.98903	8.77948	0.692304	2.76807
VF13541_bHLH39	20.3315	9.63763	12.3477	2.31677	1.11065
VF13570_bHLH40	0.00897133	0	0	0.0113707	0
VF28295_bHLH41	18.3973	25.91	3.14898	3.04023	2.05355
VF19062_bHLH42	0	0	0.178683	0	0.178318
VF18316_bHLH43	5.64742	29.1098	11.2322	6.53312	30.724
VF11395_bHLH44	26.6338	25.7837	20.1894	8.50476	15.7469
VF19570_bHLH45	25.9541	25.4475	28.9897	14.4506	19.7286
VF19458_bHLH46	33.6711	25.2494	2.08713	1.3248	0.472115
VF19443_bHLH47	0.06121	2.19952	10.9083	2.64802	5.07681
VF11661_bHLH48	1.15696	1.14283	0.521228	0.0569853	0.10979
VF11607_bHLH49	39.4888	1.79686	0.840218	0.0295963	0.244829
VF11578_bHLH50	4.32126	1.1117	0.480745	0	9.88499
VF06102_bHLH51	17.2589	10.8999	9.65963	4.09099	7.10139
VF06258_bHLH52	45.0865	18.8985	89.3481	4.92665	8.16365
VF11322_bHLH53	1.30022	1.43318	0.369496	0.107132	0.619749
VF07732_bHLH54	10.2139	2.82062	136.125	9.42499	29.0691
VF17699_bHLH55	22.7537	23.1218	15.3918	10.3112	22.0015
VF09423_bHLH56	87.6771	230.65	52.2155	93.5249	219.241
VF16960_bHLH57	0	0	0	0.0234167	0
VF02906_bHLH58	2.31515	1.39779	1.37072	0.103167	1.71526
VF20359_bHLH59	72.7621	23.2169	21.5723	8.13219	7.64849
VF12272_bHLH60	0.092062	0	0.0736763	1.15317	0
VF16130_bHLH61	56.5129	16.0576	15.3518	5.35009	5.74633
VF15999_bHLH62	272.378	0.158883	0.0821277	0.0414387	0.121504
VF23788_bHLH63	24.6825	45.5681	66.1196	32.2236	37.9672
VF09719_bHLH64	29.3358	23.8677	7.69366	7.48834	2.75323
VF15666_bHLH65	12.761	21.8005	105.235	20.0021	3.18409
VF15576_bHLH66	0	0	0	0	0.00763867
VF01977_bHLH67	13.149	18.7737	15.6306	24.3631	22.8801
VF01976_bHLH68	33.0198	25.155	19.3106	9.4163	7.3662
VF08100_bHLH69	129.806	82.2127	23.0399	10.1451	13.0305
VF05608_bHLH70	24.0855	20.2893	1.11779	0.328244	0.325841
VF13795_bHLH71	0.939437	0.423372	0.576252	0.359385	0.035974
VF13753_bHLH72	25.8904	9.02087	79.4127	3.23188	2.52283
VF18024_bHLH73	0	0	0	0	0
VF17941_bHLH74	4.16136	4.72632	118.866	39.9659	78.5352
VF17940_bHLH75	0.161493	2.68459	3.4903	0.350984	0.456022
VF17922_bHLH76	0	0.357866	0.0648837	0.0211847	0.0300797
VF27313_bHLH77	5.34921	5.99827	7.44129	2.42019	12.0648
VF27276_bHLH78	8.3358	15.5341	18.0364	33.4272	16.5057
VF27148_bHLH79	0	0.008885	0.009561	0	0
VF26964_bHLH80	2.0087	3.61525	4.57009	3.75414	8.10739
VF25122_bHLH81	13.3792	22.5025	87.2318	26.5051	39.7063
VF25114_bHLH82	1.77565	1.67207	2.16542	6.68074	36.472
VF05154_bHLH83	4.61587	3.33817	0	0	0.00611767
VF05222_bHLH84	38.4188	21.0786	17.4439	9.68065	8.25999
VF05285_bHLH85	0.360224	0	0	0	0
VF05291_bHLH86	9.048	8.37761	10.9421	18.4523	20.654
VF26291_bHLH87	0.718671	1.54421	0.571374	1.34557	0.0462977
VF26396_bHLH88	54.5158	29.3544	18.0798	7.47867	3.32467
VF26416_bHLH89	37.7323	23.9153	14.8463	11.7711	11.7643
VF26434_bHLH90	6.05472	6.98526	10.4611	5.81518	15.3406
VF21133_bHLH91	4.50448	0.71038	0.599321	0.206099	0.120365
VF07417_bHLH92	0.0143393	0	0	0	0
VF14618_bHLH93	0	0	0	0	0
VF14617_bHLH94	0	0	0	0	0
VF06951_bHLH95	114.064	144.856	97.1715	87.8897	107.526
VF05755_bHLH96	0	0	0	0.014581	0
VF04208_bHLH97	31.8713	36.3231	23.5054	20.8721	38.1969
VF24512_bHLH98	0	0.199146	0.0237723	0	0
VF17182_bHLH99	5.1072	2.59819	0.853378	0.369384	1.1881
VF17183_bHLH100	0	0.373978	0.252701	0.0357713	0.580478
VF17184_bHLH101	0.179444	1.68679	0.417256	0.093066	0.156073
VF13305_bHLH102	0	0	0	0	0
VF22717_bHLH103	1.37927	1.09585	1.62679	0.816758	0.121788
VF11429_bHLH104	0.97228	2.60965	1.17997	0.643594	0.512127
