# Supplementary material for: Genome-wide identification and transcriptional profiling of the basic helix-loop-helix gene family in tung tree (Vernicia fordii)
Source: PeerJ. 2022 Sep 28;10:e13981. doi: 10.7717/peerj.13981 (PMC9526410; doi:10.7717/peerj.13981)
Supplement: Table S6 [file peerj-10-13981-s006.xlsx]

## Sheet: Sheet1
Tissues	Treatment time	bHLH29	bHLH31	bHLH43	bHLH47	bHLH51	bHLH57	bHLH59	bHLH70	bHLH72	bHLH103
Petiole	Petiole_0h	1.00221	1.02861	1.09218	1.04155	1.0114	1.02134	1.00657	1.00276	1.00417	1.01053
	Petiole_2h	1.03901	1.14517	1.09516	2.24627	0.889321	1.10303	0.626383	2.31151	1.15244	1.21445
	Petiole_4h	1.40492	2.49571	1.63755	3.35345	3.1041	0.972976	2.13551	1.39941	1.6404	1.06748
	Petiole_8h	1.41356	2.12415	0.812992	6.60945	2.51217	0.830428	1.01692	1.42837	0.757731	0.87614
	Petiole_12h	1.51575	2.45378	0.649546	6.48534	2.56117	1.19392	1.00717	1.32487	0.539308	0.831313
	Petiole_72h	4.4719	1.34758	0.208324	6.34912	0.980772	1.49517	1.51744	1.55334	0.161293	2.43294
	Petiole_96h	7.34888	0.0807939	0.172693	5.95477	0.807748	0.908838	1.61026	4.07365	0.20546	1.93364
	Petiole_144h	3.06825	0.624296	0.140808	4.1409	0.271108	0.483183	2.80995	8.04069	0.260655	0.731655
Leaf	Leaf_0h	1.00274	1.02171	1.00015	1.00831	1.00271	1.00395	1.00133	1.00361	1.0118	1.03309
	Leaf_2h	0.568519	1.02986	0.640139	0.690099	0.91633	1.07381	0.353196	1.62373	0.908516	0.777183
	Leaf_4h	1.31421	2.31939	1.352	0.785959	3.28872	0.809412	1.38208	0.585627	0.660631	0.952854
	Leaf_8h	0.884415	1.81273	0.706033	1.09701	1.95001	0.470181	0.848954	0.837777	0.368504	1.26301
	Leaf_12h	0.923097	1.51034	0.499191	0.757854	1.7585	0.982258	0.781315	1.15275	0.489682	1.64456
	Leaf_72h	1.90821	1.16573	0.147386	3.68428	0.648848	1.41283	2.30703	1.26492	0.26817	2.54709
	Leaf_96h	6.16499	2.0302	0.19663	4.70623	1.29786	0.513951	2.39818	6.41301	0.415675	4.65949
	Leaf_144h	4.02821	1.51343	0.178127	3.05332	0.668122	0.756271	2.06635	14.8915	0.421334	2.28425
Root	Root_0h	1.02134	1.0006	1.00388	1.0052	1.001	1.01656	1.00011	1.00071	1.00072	1.00243
	Root_2h	0.824583	1.08938	0.869839	0.610964	0.652555	3.29299	1.45887	0.971196	0.716172	0.993071
	Root_4h	0.697804	0.730853	0.858042	1.13186	0.787078	4.21567	1.16231	0.507018	0.657071	0.594866
	Root_8h	0.666195	0.936239	0.707209	1.36299	0.778112	11.9354	0.952309	0.273685	0.368399	0.798242
	Root_12h	3.78883	0.884332	0.38171	2.20718	0.928915	13.016	3.7565	6.01629	0.174289	1.43135
	Root_72h	2.37696	1.181	0.232399	1.92509	0.764456	21.6391	3.00843	7.02136	0.120025	2.10164
	Root_96h	3.50894	0.870154	0.43659	1.70177	0.857575	6.97551	4.01158	13.3426	0.228334	1.85683
	Root_144h	2.91677	0.645696	0.450033	5.09272	0.536219	1.26753	3.55083	3.27826	0.148699	1.10191
