# Supplementary material for: Genome-wide identification and transcriptional profiling of the basic helix-loop-helix gene family in tung tree (Vernicia fordii)
Source: PeerJ. 2022 Sep 28;10:e13981. doi: 10.7717/peerj.13981 (PMC9526410; doi:10.7717/peerj.13981)
Supplement: Table S7 [file peerj-10-13981-s007.xlsx]

## Sheet: Sheet1
Gene Name	C2 vs C1	C3 vs C1	C4 vs C1	C3 vs C2	C4 vs C2	C4 vs C3	X2 vs X1	X3 vs X1	X4 vs X1	X3 vs X2	X4 vs X2	X4 vs X3	C1 vs X1	C2 vs X2	C3 vs X3	C4 vs X4
VF21901_bHLH1	0.144126	0.830009	0.368265	0.526317	0.113777	0.252367	0.0501053	0.0520597	0.0791096	0.0530989	0.0756434	0.0971863	0.0633804	0.242315	0.877106	0.692749
VF21918_bHLH2	0.05	0.05	0.0723605	0.05	0.0723605	0.0723605	0.104579	0.05	0.916155	0.104579	0.757639	0.916155	0.05	0.104579	0.05	0.826549
VF21919_bHLH3	0.0593291	0.0707044	0.643679	0.0521865	0.743085	0.785513	0.0719564	0.0920501	0.503764	0.0530926	0.671644	0.728607	0.0525934	0.05	0.050079	0.055
VF18713_bHLH4	0.153509	0.645471	0.0973729	0.289079	0.346883	0.843377	0.0504252	0.327738	0.119004	0.306118	0.130773	0.624277	0.132739	0.398961	0.380042	0.160999
VF18726_bHLH5	0.0576268	0.0767432	0.283061	0.114183	0.375574	0.147884	0.0502985	0.0606515	0.0505266	0.0645605	0.0516192	0.056415	0.362474	0.288558	0.429965	0.832691
VF23690_bHLH6	0.0903027	0.142034	0.214798	0.0598028	0.0893615	0.059585	0.0522295	0.0519695	0.961123	0.0584213	0.947861	0.970949	0.051702	0.087882	0.204694	0.68261
VF06016_bHLH7	0.278973	0.456618	0.530714	0.896823	0.926439	0.0539774	0.0507098	0.202344	0.261304	0.181264	0.236561	0.0544116	0.120342	0.60347	0.0502117	0.0503201
VF19981_bHLH8	0.0500186	0.199512	0.0726218	0.196028	0.0713214	0.102998	0.784517	0.733399	0.948539	0.0531025	0.1346	0.171989	0.633238	0.0745574	0.286616	0.409952
VF11543_bHLH9	0.0833525	0.0521084	0.686752	0.0684464	0.846471	0.733107	0.0543645	0.0504658	0.063371	0.0577012	0.0524248	0.0689064	0.109436	0.0658341	0.0803617	0.937841
VF10931_bHLH10	0.050309	0.0515888	0.0514028	0.0504959	0.0503946	0.0500058	0.0500082	0.0522831	0.950507	0.0525656	0.951367	0.934314	0.0500866	0.0508853	0.050002	0.934692
VF22872_bHLH11	0.0584745	0.0577026	0.248124	0.0827553	0.171645	0.336168	0.0739805	0.0603169	0.868132	0.052767	0.942035	0.921729	0.0691671	0.0617349	0.0655122	0.597475
VF03267_bHLH12	0.06661	0.0599649	0.673686	0.103295	0.528381	0.771617	0.0953597	0.160204	0.572303	0.0631208	0.330302	0.219439	0.16491	0.23094	0.607222	0.109606
VF27670_bHLH13	0	0	0	0	0	0	0	0	0	0	0	0	0	0	0	0
VF25485_bHLH14	0	0	0	0	0	0	0	0	0	0	0	0	0	0	0	0
VF17514_bHLH15	0.0563765	0.0829479	0.851612	0.0601014	0.790423	0.695613	0.051695	0.369274	0.769254	0.324532	0.730662	0.188127	0.0500081	0.0517157	0.192167	0.0614716
VF18516_bHLH16	0.0500857	0.111404	0.0537901	0.116268	0.0550208	0.0839708	0.0620449	0.219822	0.523418	0.138333	0.395833	0.132746	0.154574	0.233637	0.810747	0.88006
VF20624_bHLH17	0.242069	0.240458	0.245823	0.0500031	0.0500167	0.0500342	0.152078	0.526967	0.848651	0.196966	0.542492	0.161149	0.406812	0.539128	0.157926	0.0500015
VF13185_bHLH18	0.0958987	0.0602989	0.0505387	0.0623092	0.086233	0.0561017	0.0512057	0.171079	0.958786	0.147031	0.948893	0.768133	0.100362	0.0506184	0.0993724	0.875066
VF26084_bHLH19	0.0687598	0.125571	0.0747276	0.0681195	0.0503975	0.0630907	0.0564696	0.0500438	0.866036	0.0575849	0.910694	0.861768	0.052034	0.060269	0.158278	0.955664
VF05916_bHLH20	0.218637	0.0723303	0.342509	0.114982	0.0661239	0.200112	0.11694	0.0565001	0.265511	0.0808486	0.549524	0.348397	0.605895	0.0600904	0.341893	0.518726
VF03577_bHLH21	0	0	0	0	0	0	0	0	0	0	0	0	0	0	0	0
VF03728_bHLH22	0.0674472	0.205666	0.538194	0.115899	0.685861	0.890794	0.073979	0.131272	0.0613657	0.0660429	0.119903	0.207349	0.127039	0.140589	0.0788325	0.721595
VF28097_bHLH23	0.286616	0.299462	0.316918	0.0501613	0.0508739	0.0502841	0.479908	0.772001	0.891117	0.125139	0.249809	0.0775882	0.40278	0.224296	0.0725727	0.0500017
VF13410_bHLH24	0.0523131	0.169728	0.201833	0.137359	0.165	0.0517239	0.0500233	0.906193	0.051084	0.90856	0.0514258	0.888848	0.0534218	0.0500308	0.688551	0.136255
VF23386_bHLH25	0.0550985	0.488567	0.555894	0.4055	0.472099	0.0532895	0.232406	0.462888	0.365633	0.0980824	0.0675446	0.0572238	0.0535133	0.134139	0.0565954	0.101101
VF10982_bHLH26	0.0516015	0.141645	0.0844693	0.168839	0.0709686	0.295075	0.0731221	0.646664	0.0568365	0.472127	0.106104	0.732409	0.0938707	0.0502563	0.13549	0.0612358
VF22129_bHLH27	0.0539385	0.0503081	0.285731	0.0520395	0.35148	0.30353	0.0974872	0.389947	0.374393	0.639193	0.623793	0.0501912	0.113056	0.341878	0.146165	0.633648
VF04859_bHLH28	0.138556	0.107208	0.114307	0.0531432	0.0517779	0.0501924	0.740468	0.407735	0.140044	0.142001	0.411285	0.137444	0.0633753	0.548926	0.278005	0.0758798
VF02921_bHLH29	0.85625	0.539065	0.441142	0.161745	0.227968	0.0569772	0.132562	0.123026	0.206737	0.0502681	0.504889	0.485603	0.386005	0.0815561	0.0682297	0.249049
VF02926_bHLH30	0.0662372	0.0569494	0.0913798	0.0519068	0.0555536	0.0640474	0.0500777	0.0596791	0.931643	0.061509	0.935011	0.884597	0.0535423	0.0534366	0.0649738	0.971742
VF16344_bHLH31	0.0502023	0.0502897	0.0501865	0.0500078	0.0507775	0.0509416	0.0500118	0.0500003	0.953095	0.0500082	0.95209	0.952925	0.050271	0.0500014	0.0500013	0.943705
VF23100_bHLH32	0.211908	0.355211	0.914984	0.0715555	0.585177	0.414578	0.176137	0.068559	0.135754	0.0956467	0.465477	0.239305	0.0515482	0.0500312	0.188379	0.982345
VF15320_bHLH33	0.617807	0.801689	0.238977	0.0850479	0.172915	0.344593	0.21758	0.642455	0.688413	0.209434	0.247179	0.0518304	0.10183	0.070349	0.0537729	0.463043
VF12800_bHLH34	0	0	0	0	0	0	0	0	0	0	0	0	0	0	0	0
VF10463_bHLH35	0.199242	0.501497	0.770541	0.136357	0.355441	0.114167	0.106386	0.333451	0.284328	0.133309	0.548042	0.830884	0.389647	0.0517725	0.441713	0.0656116
VF01645_bHLH36	0.0737712	0.0661357	0.159362	0.131094	0.290886	0.0896131	0.0500535	0.178972	0.945356	0.173508	0.942924	0.714301	0.0582787	0.0548732	0.0679353	0.64718
VF10258_bHLH37	0.0645415	0.0682248	0.0549606	0.0502022	0.0524793	0.0541026	0.0501735	0.070887	0.882203	0.067199	0.889711	0.946364	0.0500879	0.0636292	0.05	0.922423
VF24227_bHLH38	0.102561	0.195442	0.679751	0.0713772	0.420247	0.26455	0.0507465	0.0654483	0.0691544	0.0593488	0.0622605	0.0501935	0.112623	0.315025	0.591673	0.945417
VF13541_bHLH39	0.0531193	0.0505198	0.126578	0.0510899	0.162366	0.140343	0.0617272	0.392784	0.7959	0.277602	0.694346	0.195869	0.0881865	0.184105	0.643014	0.724171
VF13570_bHLH40	0.0503729	0.0522576	0.92443	0.0507942	0.932224	0.942465	0.0500098	0.0501588	0.0604421	0.0500897	0.0610977	0.0632055	0.0519591	0.0507877	0.0500875	0.897104
VF28295_bHLH41	0.0502125	0.133374	0.148029	0.142421	0.138695	0.414355	0.0768744	0.482378	0.72233	0.668756	0.857814	0.097183	0.352637	0.557708	0.216157	0.0504478
VF19062_bHLH42	0.10432	0.111465	0.110615	0.050205	0.0501603	0.0500027	0.796071	0.90441	0.908314	0.0767213	0.0794266	0.0500625	0.723095	0.072847	0.050005	0.0500536
VF18316_bHLH43	0.050676	0.0500762	0.0526383	0.0512068	0.0506418	0.0536145	0.0502382	0.0609261	0.959454	0.0579154	0.95532	0.924575	0.0508188	0.0515356	0.0571397	0.934251
VF11395_bHLH44	0.686177	0.200318	0.599729	0.264622	0.0562111	0.195154	0.0520152	0.0507112	0.115938	0.0503314	0.0942257	0.10249	0.0918397	0.403223	0.072371	0.139753
VF19570_bHLH45	0.600885	0.290118	0.0711002	0.127834	0.432186	0.164993	0.158665	0.05634	0.521204	0.220709	0.842709	0.427991	0.0793385	0.118518	0.206688	0.491148
VF19458_bHLH46	0.0622477	0.0500762	0.159927	0.0642794	0.250044	0.153931	0.0635148	0.606861	0.450707	0.730147	0.586333	0.0680739	0.0501469	0.108386	0.603005	0.787586
VF19443_bHLH47	0.0536774	0.0500348	0.130179	0.0529949	0.0984808	0.126727	0.0735891	0.204306	0.624189	0.104307	0.446644	0.208879	0.230398	0.320125	0.645322	0.762673
VF11661_bHLH48	0	0	0	0	0	0	0	0	0	0	0	0	0	0	0	0
VF11607_bHLH49	0.0512436	0.0551775	0.149981	0.05134	0.17478	0.203445	0.085548	0.439823	0.62642	0.655494	0.808985	0.0761097	0.0701323	0.0565752	0.521148	0.95093
VF11578_bHLH50	0.0885451	0.0984219	0.743839	0.0505297	0.890542	0.902755	0.0562508	0.0879701	0.0566038	0.0630942	0.0500048	0.0625926	0.0798863	0.0531473	0.0718855	0.919465
VF06102_bHLH51	0.0541835	0.0557613	0.658056	0.0699279	0.585632	0.73599	0.113155	0.347195	0.377407	0.13294	0.662245	0.89504	0.119258	0.256913	0.724203	0.901378
VF06258_bHLH52	0.1792	0.614181	0.175035	0.228552	0.0500308	0.233497	0.0541939	0.0516588	0.070953	0.0505748	0.0945171	0.0847196	0.158235	0.434943	0.868783	0.668528
VF11322_bHLH53	0.0673065	0.0534702	0.0956089	0.0552085	0.0564513	0.073478	0.0611472	0.1736	0.903625	0.108299	0.839293	0.613454	0.0501689	0.101093	0.209818	0.970468
VF07732_bHLH54	0.0830365	0.0502691	0.30506	0.0894433	0.50859	0.288367	0.471684	0.184685	0.381483	0.838015	0.943721	0.0922219	0.102542	0.105763	0.388907	0.141741
VF17699_bHLH55	0	0	0	0	0	0	0	0	0	0	0	0	0	0	0	0
VF09423_bHLH56	0.0514238	0.0501318	0.0777969	0.0524238	0.0664717	0.0818501	0.0505619	0.0571768	0.947106	0.0537091	0.939115	0.914289	0.0542161	0.052588	0.0762558	0.906611
VF16960_bHLH57	0.0608572	0.303055	0.88916	0.206099	0.819954	0.412537	0.0511281	0.0511281	0.0511281	0.05	0.05	0.05	0.0511281	0.0608572	0.303055	0.88916
VF02906_bHLH58	0.123501	0.0503602	0.0836163	0.134647	0.263011	0.0768732	0.0501302	0.680593	0.167144	0.692543	0.159078	0.927495	0.0654037	0.0741531	0.813399	0.0508501
VF20359_bHLH59	0.328807	0.371707	0.125423	0.0515466	0.638161	0.680708	0.0542088	0.0536233	0.750869	0.0657475	0.686444	0.803691	0.109852	0.530719	0.713025	0.777063
VF12272_bHLH60	0.111201	0.506079	0.282833	0.768917	0.101864	0.919158	0.0984393	0.258922	0.0552622	0.102694	0.137298	0.33227	0.185365	0.0605354	0.406682	0.0513919
VF16130_bHLH61	0	0	0	0	0	0	0	0	0	0	0	0	0	0	0	0
VF15999_bHLH62	0.204651	0.744807	0.55318	0.318356	0.160953	0.0820766	0.0519809	0.0522048	0.0665865	0.0583965	0.0803072	0.0566281	0.0614029	0.259796	0.866787	0.795827
VF23788_bHLH63	0.0525634	0.0563345	0.0583708	0.0508326	0.0703566	0.0796157	0.0501988	0.43416	0.895714	0.45059	0.903055	0.296183	0.050976	0.0592512	0.31131	0.92434
VF09719_bHLH64	0.0585599	0.0562447	0.229795	0.0501798	0.156974	0.166391	0.0513828	0.0587466	0.958307	0.0531545	0.94755	0.92727	0.0501958	0.0547898	0.0500002	0.681553
VF15666_bHLH65	0.0545975	0.0582949	0.0553425	0.0505357	0.0500277	0.0503196	0.11458	0.92402	0.0642572	0.755957	0.193474	0.962786	0.0501293	0.147973	0.95229	0.0532908
VF15576_bHLH66	0.0763265	0.0605722	0.487621	0.0534381	0.67176	0.607086	0.32891	0.1104	0.300039	0.12608	0.050764	0.11103	0.250998	0.0569816	0.141069	0.546498
VF01977_bHLH67	0.0855307	0.183945	0.562991	0.0794548	0.347307	0.186325	0.050606	0.0986683	0.879075	0.0881192	0.863822	0.700762	0.130558	0.0637023	0.0697146	0.450472
VF01976_bHLH68	0.0708229	0.0668512	0.0598587	0.0502036	0.0519783	0.0509115	0.0536214	0.0839537	0.971602	0.0651325	0.957941	0.913936	0.058667	0.0815831	0.0515581	0.909553
VF08100_bHLH69	0.662736	0.549949	0.765836	0.0599906	0.0607427	0.0921161	0.10785	0.427074	0.370876	0.189369	0.153301	0.0524422	0.0568688	0.300117	0.0504865	0.128039
VF05608_bHLH70	0.0916006	0.0652522	0.253536	0.0562325	0.472529	0.381518	0.0796525	0.0954325	0.220385	0.0515903	0.104687	0.0871422	0.216616	0.191131	0.29928	0.954909
VF13795_bHLH71	0.0551104	0.458843	0.290459	0.376759	0.223219	0.0734649	0.0501929	0.0503484	0.149788	0.0500228	0.159215	0.162557	0.152995	0.195445	0.779171	0.901262
VF13753_bHLH72	0.880853	0.208971	0.10991	0.513039	0.679606	0.0718419	0.139274	0.0524581	0.117737	0.173068	0.368014	0.0936482	0.054902	0.698523	0.322902	0.388341
VF18024_bHLH73	0.438662	0.438662	0.177837	0.05	0.121026	0.121026	0.0975595	0.0975595	0.0975595	0.05	0.05	0.05	0.21531	0.05	0.05	0.121026
VF17941_bHLH74	0.0598004	0.162055	0.383333	0.103652	0.278439	0.107063	0.0598005	0.155197	0.607939	0.0990095	0.714161	0.887161	0.065828	0.0658278	0.0684564	0.989467
VF17940_bHLH75	0.140195	0.05	0.0761724	0.140195	0.0681014	0.0761724	0.0557253	0.0994324	0.410078	0.140598	0.49827	0.191588	0.11315	0.065138	0.28138	0.511638
VF17922_bHLH76	0.0679054	0.0509571	0.0501201	0.0605096	0.0710083	0.0517562	0.875987	0.0591174	0.0612877	0.924573	0.800186	0.091334	0.0509328	0.802901	0.0591936	0.0719921
VF27313_bHLH77	0.091051	0.0781504	0.0875363	0.191731	0.0500743	0.184987	0.254718	0.362957	0.0515378	0.0611102	0.293023	0.407129	0.05658	0.0753433	0.4609	0.151569
VF27276_bHLH78	0.197156	0.279961	0.0518332	0.0584889	0.164654	0.239314	0.0501395	0.0661455	0.913077	0.0632497	0.918469	0.958509	0.192151	0.0500309	0.0508021	0.655676
VF27148_bHLH79	0.193625	0.22258	0.111759	0.0512057	0.0656404	0.075712	0.06471	0.0888418	0.0950094	0.154172	0.164332	0.0502141	0.199897	0.455717	0.822348	0.690471
VF26964_bHLH80	0.05	0.05	0.05	0.05	0.05	0.05	0.05	0.05	0.768148	0.05	0.768148	0.768148	0.05	0.05	0.05	0.768148
VF25122_bHLH81	0.110713	0.168587	0.0561457	0.0588106	0.0774843	0.118849	0.0509986	0.0585845	0.937833	0.0537082	0.948468	0.964844	0.12256	0.052884	0.0504354	0.837813
VF25114_bHLH82	0.24481	0.332485	0.491829	0.797669	0.893701	0.0697717	0.0812871	0.0934295	0.264756	0.203452	0.455447	0.111323	0.221864	0.492156	0.0586393	0.0895686
VF05154_bHLH83	0.0533799	0.0502963	0.588797	0.0516716	0.521094	0.568912	0.050705	0.0501128	0.737586	0.0513827	0.711404	0.747712	0.0526861	0.0504103	0.0505738	0.0872333
VF05222_bHLH84	0.281566	0.0587446	0.634773	0.19736	0.152057	0.527504	0.14179	0.0500349	0.0762349	0.13808	0.272257	0.0782245	0.124756	0.254257	0.183279	0.946691
VF05285_bHLH85	0.184512	0.475475	0.421012	0.134217	0.108349	0.0521813	0.134662	0.103119	0.601971	0.0533815	0.279635	0.339827	0.0875195	0.0644256	0.101156	0.176224
VF05291_bHLH86	0	0	0	0	0	0	0	0	0	0	0	0	0	0	0	0
VF26291_bHLH87	0.0633801	0.216218	0.0537533	0.132191	0.0529243	0.167905	0.0568396	0.326624	0.892109	0.41845	0.930787	0.39288	0.0565569	0.063785	0.0889015	0.902477
VF26396_bHLH88	0.0521085	0.0954111	0.0717816	0.117952	0.0602209	0.184209	0.112813	0.139738	0.8276	0.358582	0.952941	0.530663	0.0551491	0.126987	0.0501315	0.87828
VF26416_bHLH89	0.0944671	0.133636	0.563507	0.0557001	0.324419	0.249226	0.0667344	0.388398	0.95524	0.253833	0.906173	0.508748	0.0931887	0.134478	0.0560985	0.153657
VF26434_bHLH90	0.0659256	0.0651724	0.0787612	0.0500089	0.0518202	0.0520839	0.0518338	0.0515015	0.959238	0.0500165	0.946894	0.948182	0.0503125	0.0542546	0.0543981	0.902683
VF21133_bHLH91	0.104987	0.357019	0.0614999	0.148827	0.169881	0.479651	0.051345	0.0552859	0.521694	0.0620193	0.564618	0.436463	0.061466	0.144599	0.564702	0.521509
VF07417_bHLH92	0.0614095	0.23413	0.623627	0.15067	0.500221	0.180817	0.0500002	0.0501502	0.906533	0.0501615	0.906756	0.900341	0.050112	0.0639165	0.232632	0.163617
VF14618_bHLH93	0.05	0.05	0.05	0.05	0.05	0.05	0.0610995	0.884773	0.05	0.812977	0.0610995	0.884773	0.05	0.0610995	0.884773	0.05
VF14617_bHLH94	0.05	0.05	0.05	0.05	0.05	0.05	0.0504305	0.927119	0.05	0.918245	0.0504305	0.927119	0.05	0.0504305	0.927119	0.05
VF06951_bHLH95	0	0	0	0	0	0	0	0	0	0	0	0	0	0	0	0
VF05755_bHLH96	0.107845	0.84009	0.0595467	0.615732	0.0697294	0.760204	0.0719103	0.440256	0.0897072	0.611859	0.0525122	0.667176	0.0500579	0.212114	0.215023	0.145158
VF04208_bHLH97	0.139775	0.217533	0.0955062	0.0609697	0.31982	0.43632	0.0544126	0.475234	0.81366	0.398225	0.756617	0.158936	0.263491	0.0578844	0.416335	0.147296
VF24512_bHLH98	0.0669722	0.0669722	0.875886	0.05	0.937941	0.937941	0.0505553	0.0512056	0.0530718	0.0534023	0.0510126	0.058154	0.0590612	0.0534023	0.05	0.898235
VF17182_bHLH99	0.0504281	0.0505019	0.0500768	0.0500029	0.0508677	0.0509717	0.0636738	0.881063	0.115497	0.798475	0.0685477	0.668558	0.0614017	0.111122	0.940731	0.178341
VF17183_bHLH100	0.0602856	0.0604518	0.0575195	0.0500007	0.0502129	0.0502372	0.632883	0.0734654	0.0794131	0.456208	0.800146	0.158604	0.166396	0.947725	0.411403	0.114338
VF17184_bHLH101	0.091478	0.0920573	0.0894394	0.0500019	0.0500242	0.0500397	0.0539101	0.105865	0.491233	0.0795962	0.564542	0.747502	0.287354	0.58611	0.766014	0.0501881
VF13305_bHLH102	0.05	0.516005	0.05	0.516005	0.05	0.516005	0.05	0.05	0.05	0.05	0.05	0.05	0.05	0.05	0.516005	0.05
VF22717_bHLH103	0.633776	0.761064	0.0704815	0.0656432	0.468752	0.613844	0.0684599	0.130704	0.110192	0.0709205	0.0614418	0.0513834	0.0825523	0.681158	0.660559	0.0563228
VF11429_bHLH104	0.0898198	0.198567	0.460613	0.08224	0.248063	0.116793	0.0688699	0.0908063	0.206685	0.168648	0.338317	0.0850614	0.2916	0.0707389	0.144787	0.105712
